# Supplementary material for: Ultra-stretchable and multifunctional wearable electronics for superior electromagnetic interference shielding, electrical therapy and biomotion monitoring
Source: Royal Society of Chemistry journal article supplement (doi:10.1039/d0ta10991f), 2021-01-01
Supplement: d0ta10991f1.pdf [file d0ta10991f1.pdf]

**Ultra-stretchable and Multifunctional Wearable Electronics for Superior Electromagnetic Interference Shielding, Electrical Therapy and Biomotion Monitoring**

Wei Zhai,<sup>a</sup> Chunfeng Wang,<sup>b</sup> Shuo Wang,<sup>a</sup> Jiannan Li,<sup>a</sup> Yi Zhao,<sup>a</sup> Pengfei Zhan,<sup>a</sup> Kun Dai,<sup>a\*</sup> Guoqiang Zheng,<sup>a</sup> Chuntai Liu,<sup>a\*</sup> and Changyu Shen<sup>a</sup>

<sup>a</sup> *Key Laboratory of Materials Processing and Mold (Zhengzhou University), Ministry of Education, School of Materials Science and Engineering, Zhengzhou University, Zhengzhou, Henan 450001, P. R. China*

<sup>b</sup> *College of Physics and Optoelectronic Engineering, Shenzhen University, Shenzhen 518060, P. R. China*

\* Correspondence author:

E-mail: kundai@zzu.edu.cn (K. Dai), ctliu@zzu.edu.cn (C. L.)

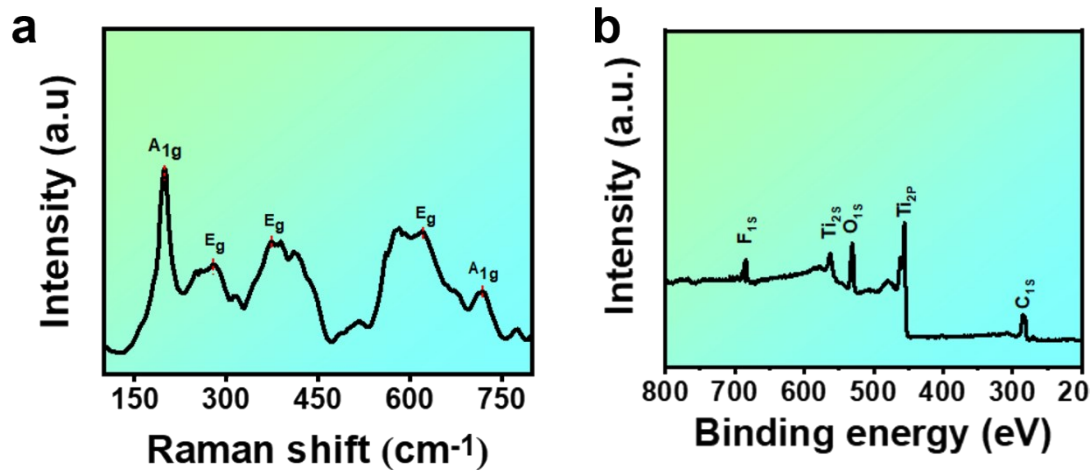

Fig. S1. Raman spectrum and XPS of MXene.

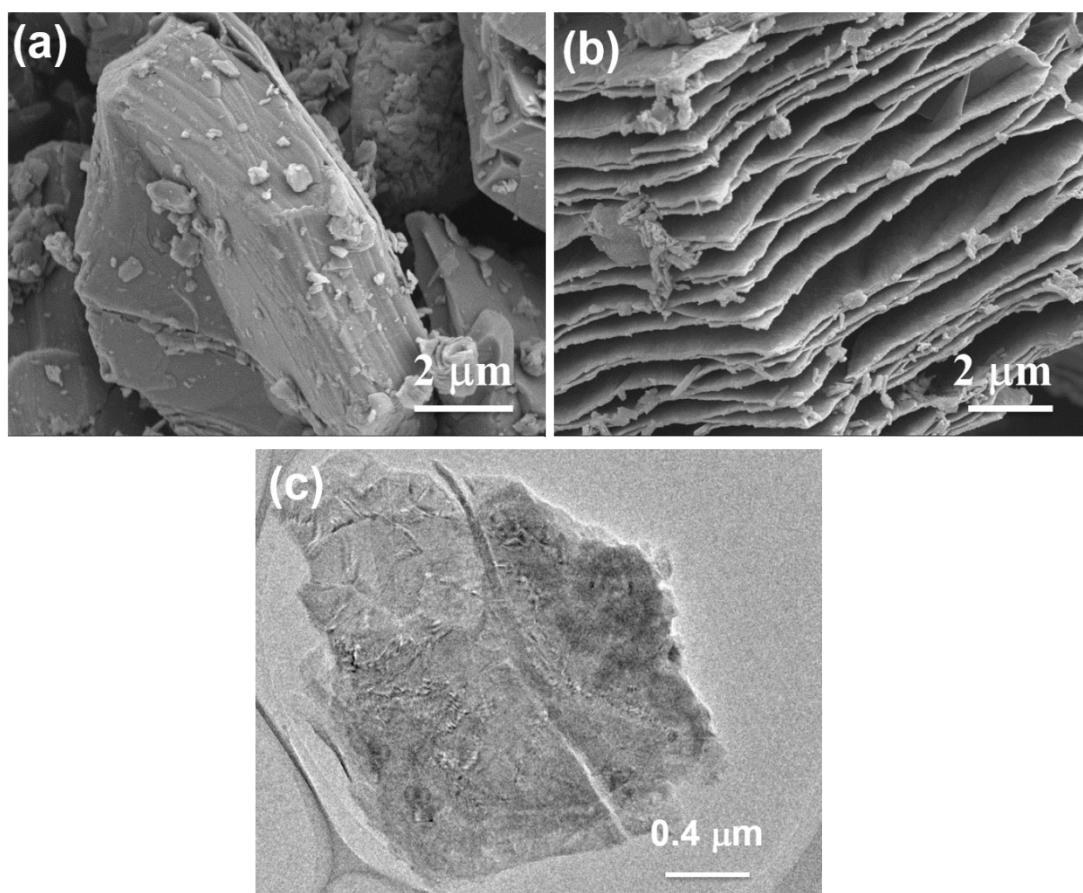

**Fig. S2.** SEM image of Max (a) and MXene (b); and TEM image of MXene nanosheets (c).

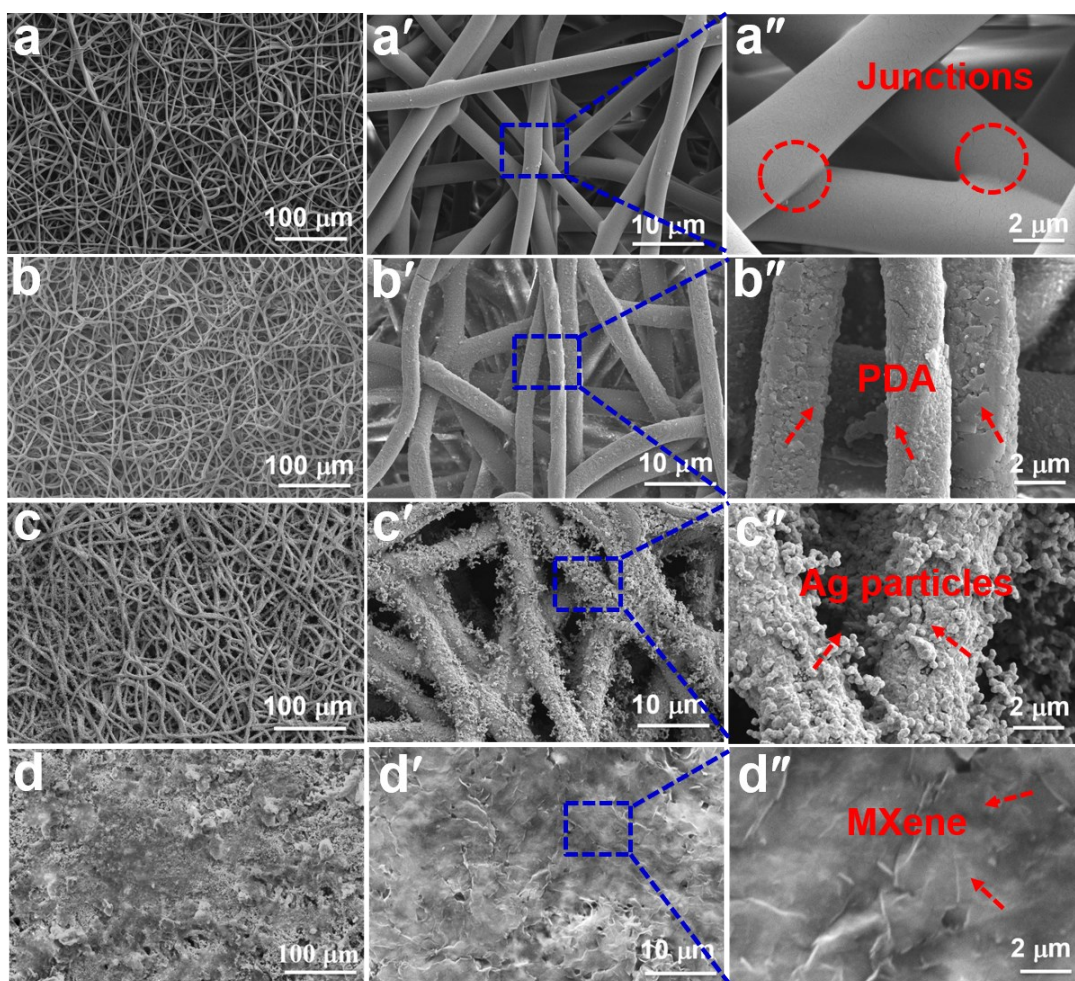

**Fig. S3.** SEM images of neat TPU fibrous film (a-a''), TPU/PDA fibrous film (b-b''), TPU/PDA/AgNPs fibrous film (c-c'') and TPU/PDA/AgNPs/MXene film (d-d'').

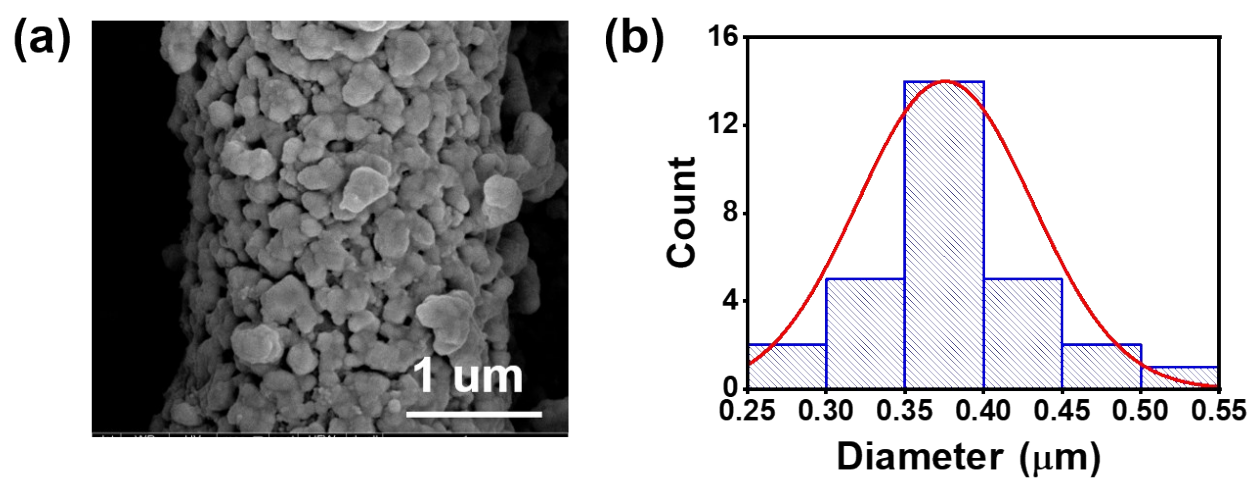

Fig.S4 Morphology and diameter of AgNPs in TAF.

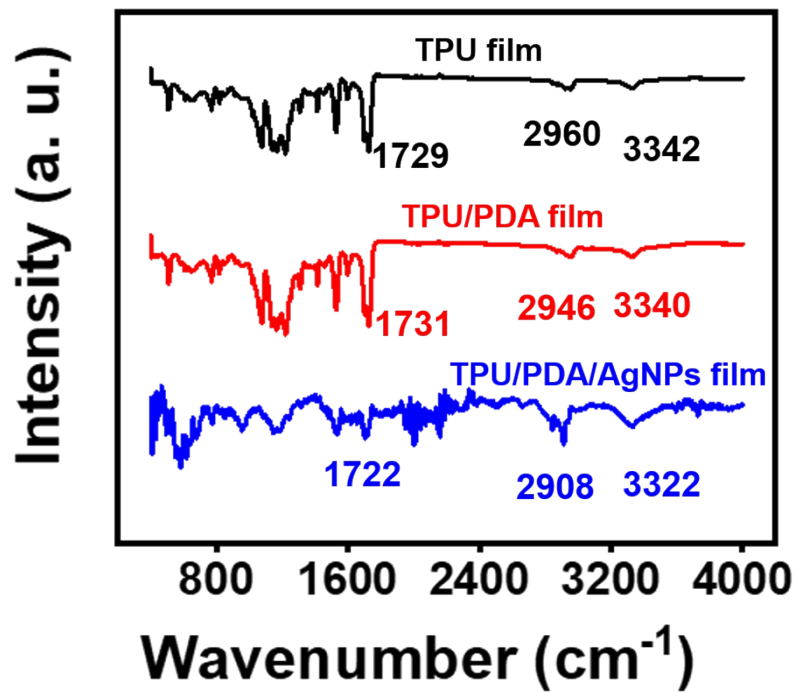

Fig. S5. FTIR spectra of pure TPU, TPU/PDA and TPU/PDA/AgNPs film.

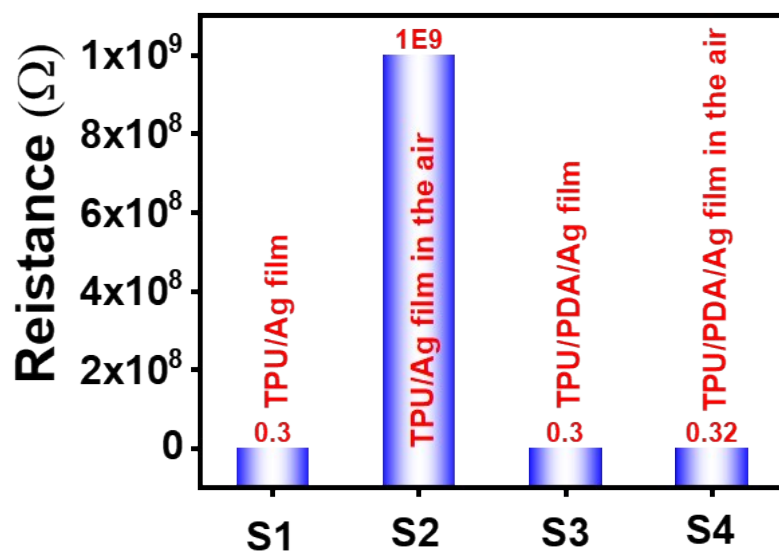

**Fig. S6.** Influence of the introduction of PDA on the conductivity of TPU/AgNPs film.

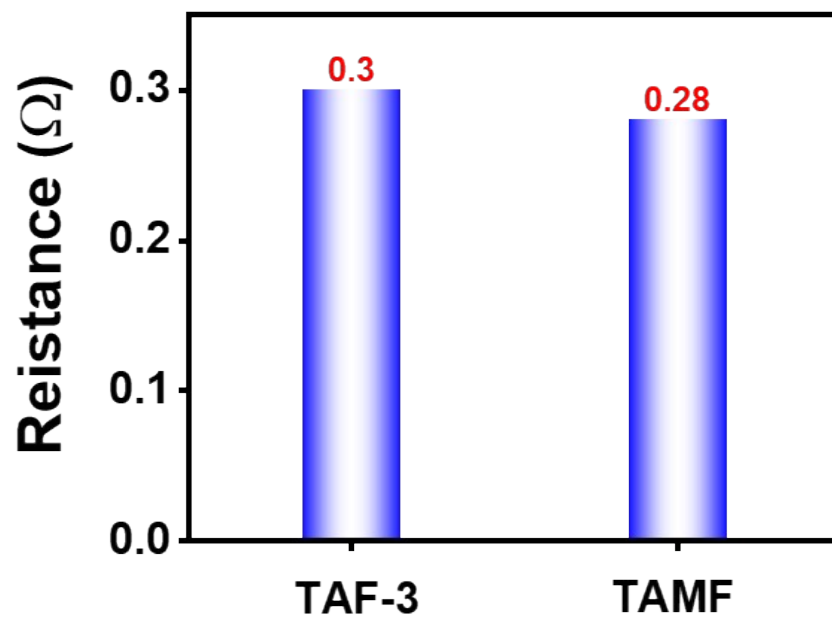

**Fig. S7.** The effect of the introduction of MXene nanosheets on the resistance.



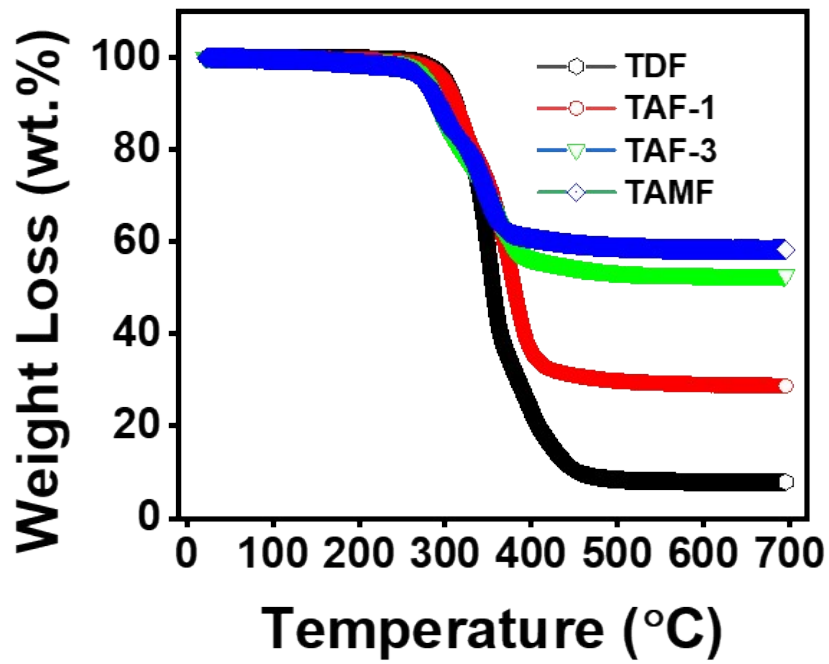

Fig.S8 Thermogravimetric analysis of TDF, TAF-1, TAF-3 and TAMF.

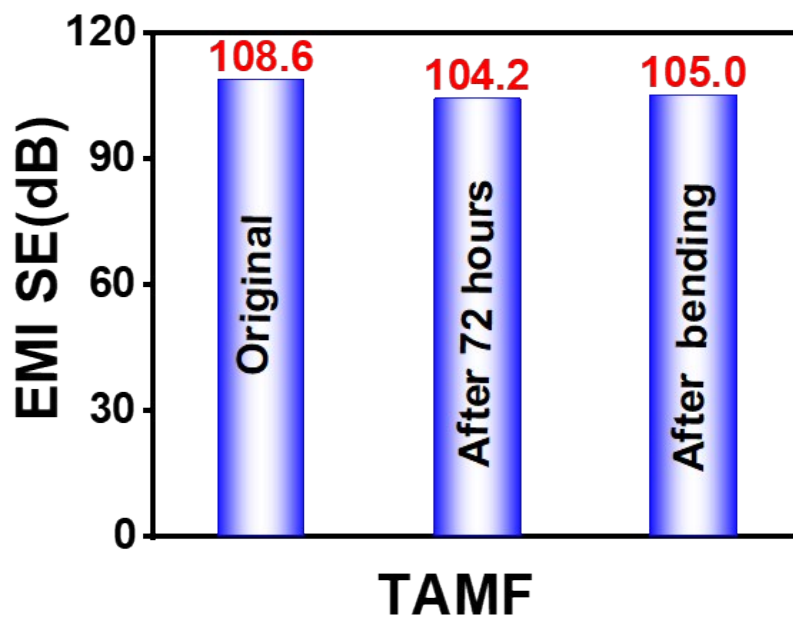

**Fig. S9.** The EMI SE of TAMF at the initial state, exposure to air for 72 h and underwent 1000 bending-releasing cycle treatments.

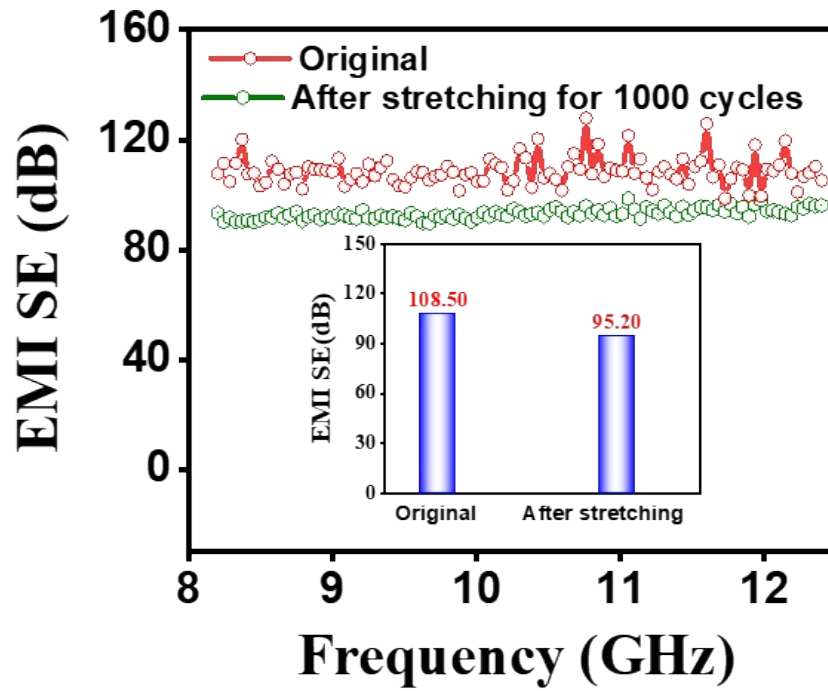

**Fig. S10** EMI SE of TAMF before and after 1000 stretching-releasing cycles. The inset shows the corresponding average value.

**Table S1** Comparison of EMI shielding performance, conductivity and filler content

of our work with previous reports.

| <b>Fillers</b> | <b>Content</b> | <b>Conductivity (S/m)</b> | <b>EMI SE</b> | <b>References</b> |
|----------------|----------------|---------------------------|---------------|-------------------|
| MXene          | 50 wt.%        | 621                       | 40            | Ref.1             |
| AgNWs          | 3 wt.%         | 1200                      | 63.9          | Ref.2             |
| MXene          | 100 wt.%       | 58000                     | 70            | Ref.3             |
| Ag@C           | 100 wt.%       | 361.1                     | 70            | Ref.4             |
| MXene          | 90 wt.%        | 26400                     | 50.2          | Ref.5             |
| AgNPs          | 88.5 wt.%      | 107.2                     | 37.8          | Ref.6             |
| MXene/PPy      | 24 wt.%        | 1000                      | 90            | Ref.7             |
| MXene/rGO      | 100 wt.%       | 1000                      | 50.7          | Ref.8             |
| AgNPs/MXene    | 48.4 wt.%      | 95238                     | 108.6         | <b>This work</b>  |

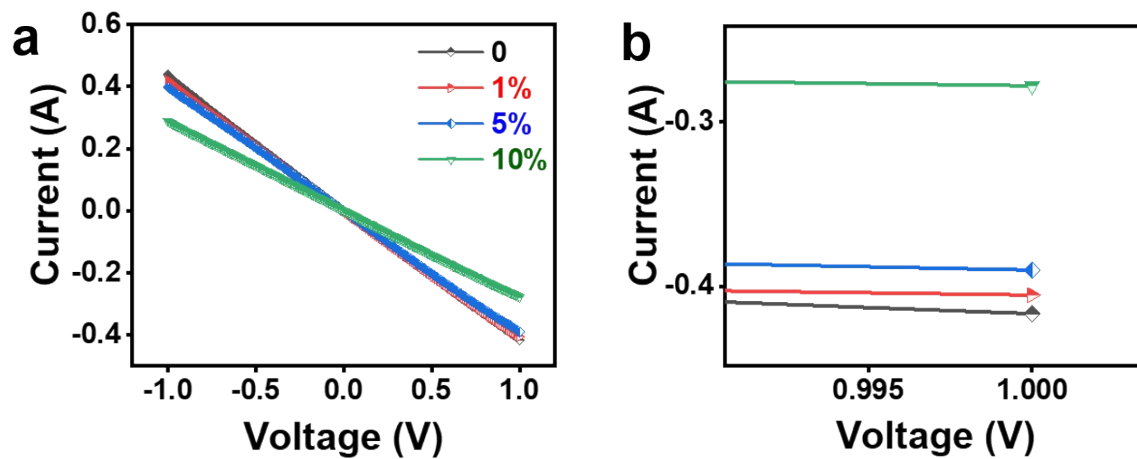

**Fig. S11.** I-V curves of TAMF in different tensile strain (a), (b) is the magnified view of (a).

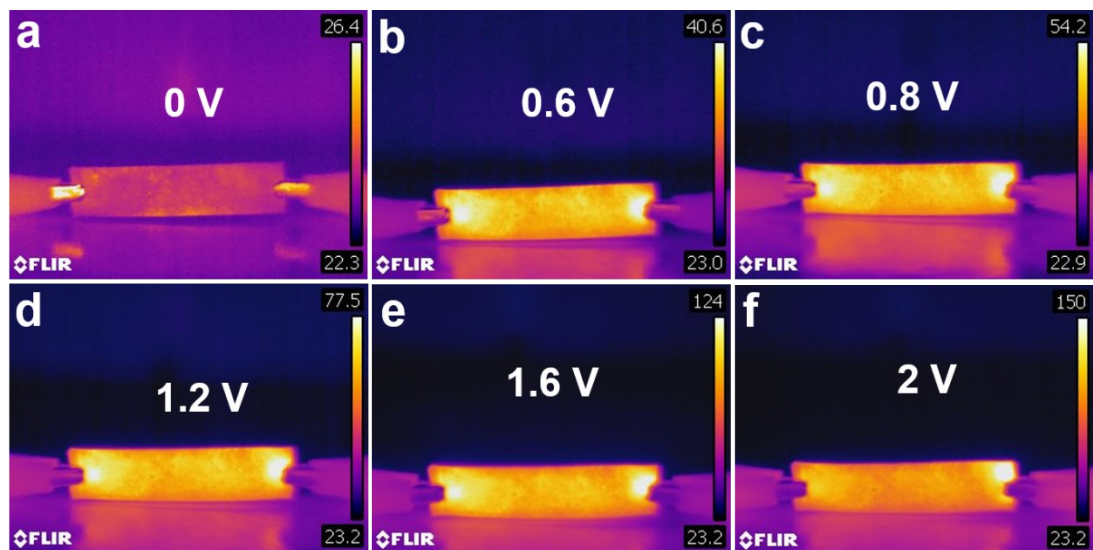

**Fig. S12.** Digital and IR camera images of the electrical heaters in wearable thermotherapy with supplied voltages of 0, 0.6, 0.8, 1.2, 1.6 and 2.0 V.

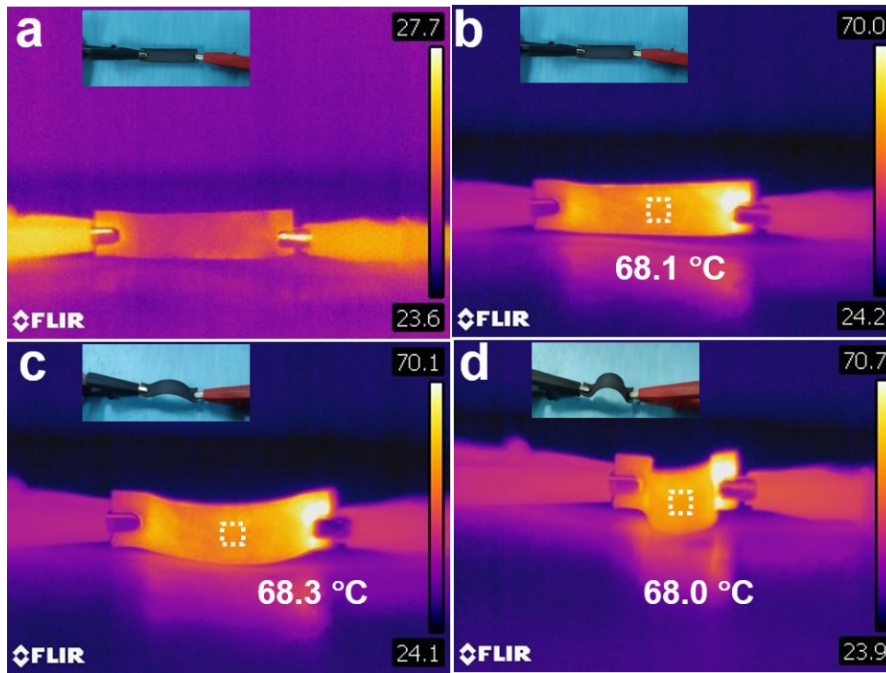

**Fig. S13.** Digital and IR camera images of the electrical heaters in wearable thermotherapy with different bending angles at the voltage of 0.6 V.

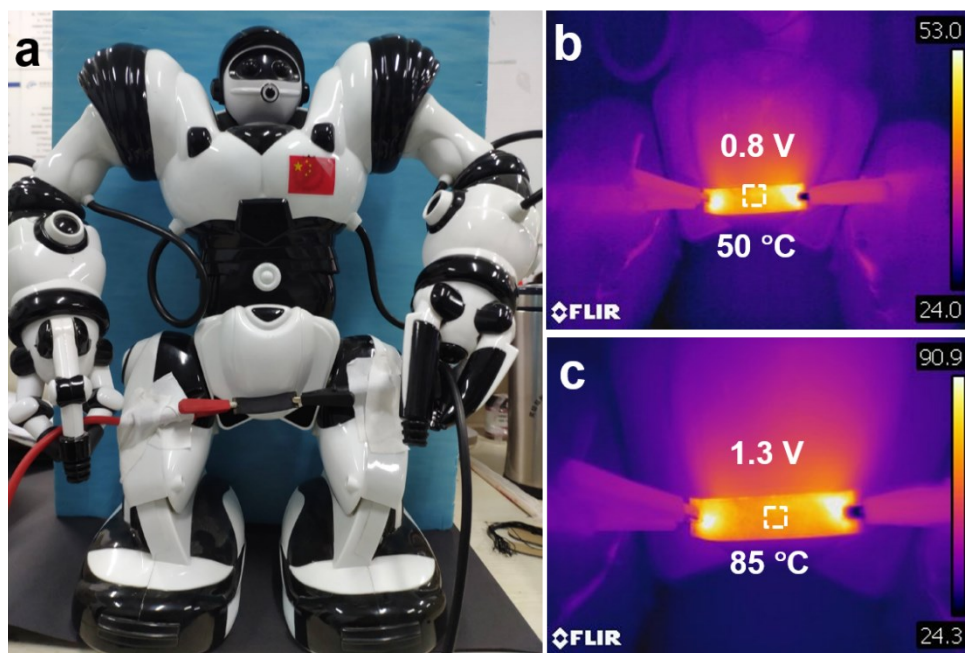

**Fig. S14.** The TAMF heater is stuck on stomach of a robot and the temperature are tested at the voltage of 0.8V and 1.3 V, respectively.



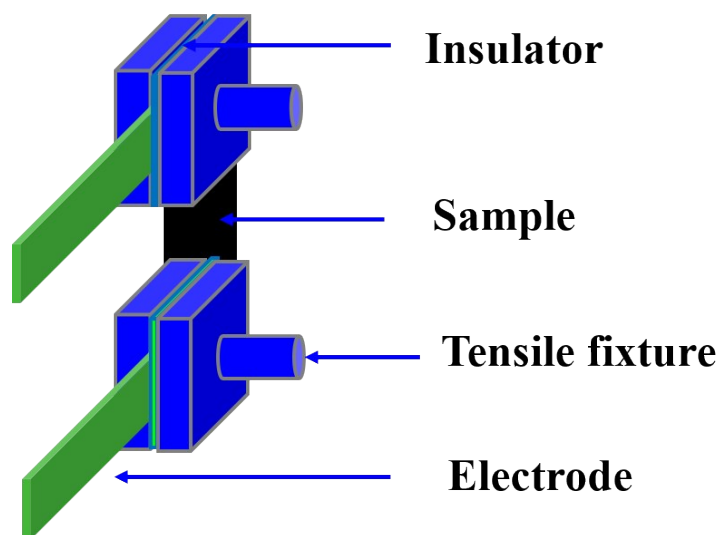

**Fig. S15.** The schematic of tensile experiment.

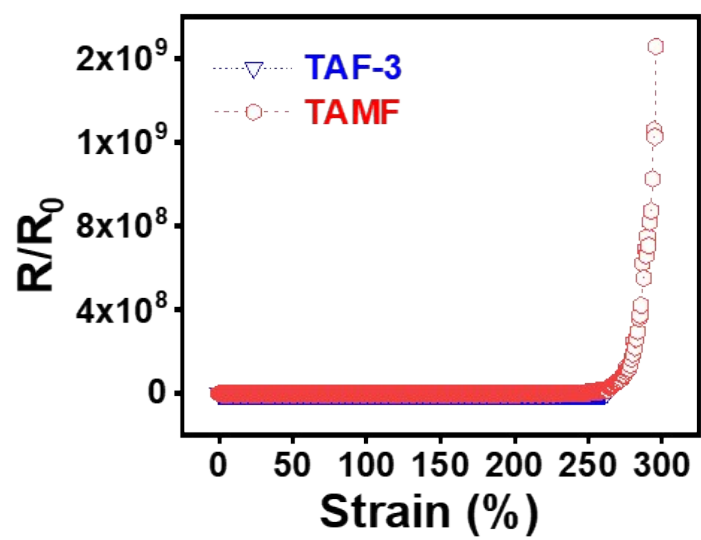

**Fig. S16.**  $R/R_0$  values of TAF-3 and TAMF as a function of strain.

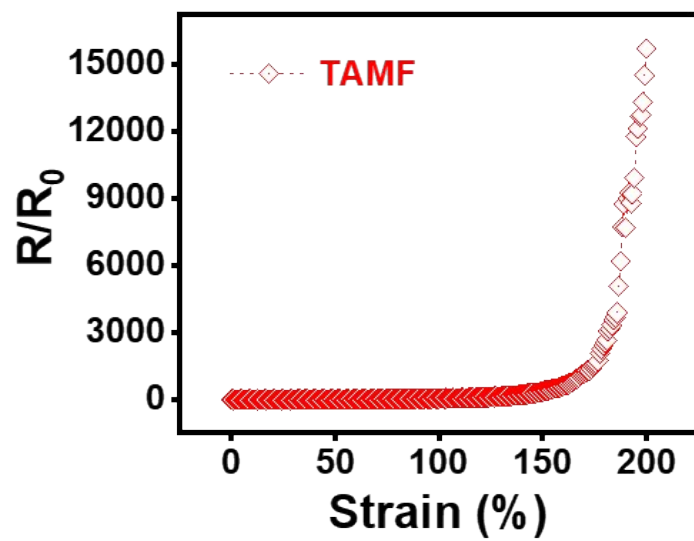

**Fig. S17.** R/R<sub>0</sub> values of TAMF as a function of strain.

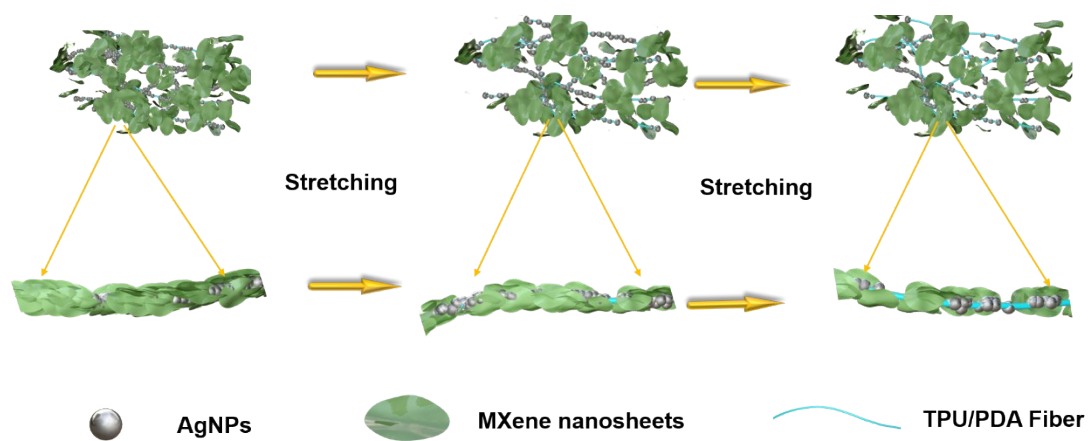

**Fig. S18.** The strain sensing mechanism of TAMF during stretching.

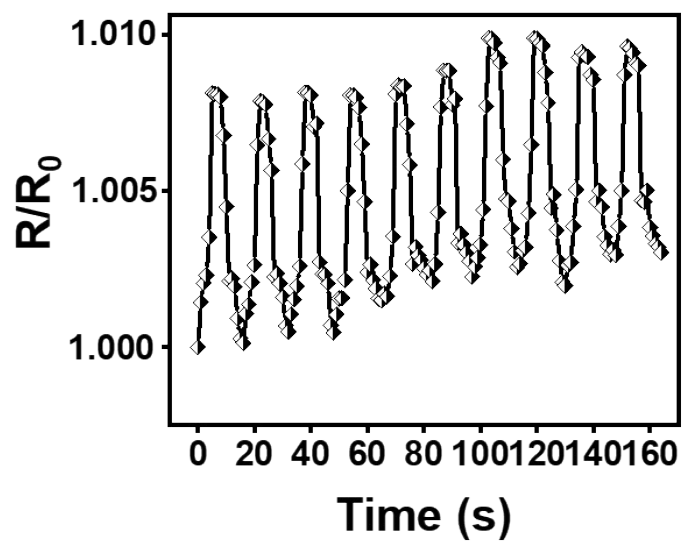

**Fig. S19.**  $R/R_0$ -time curve of TAMF towards the strains of 0.1% in 10 stretching-releasing cycles .

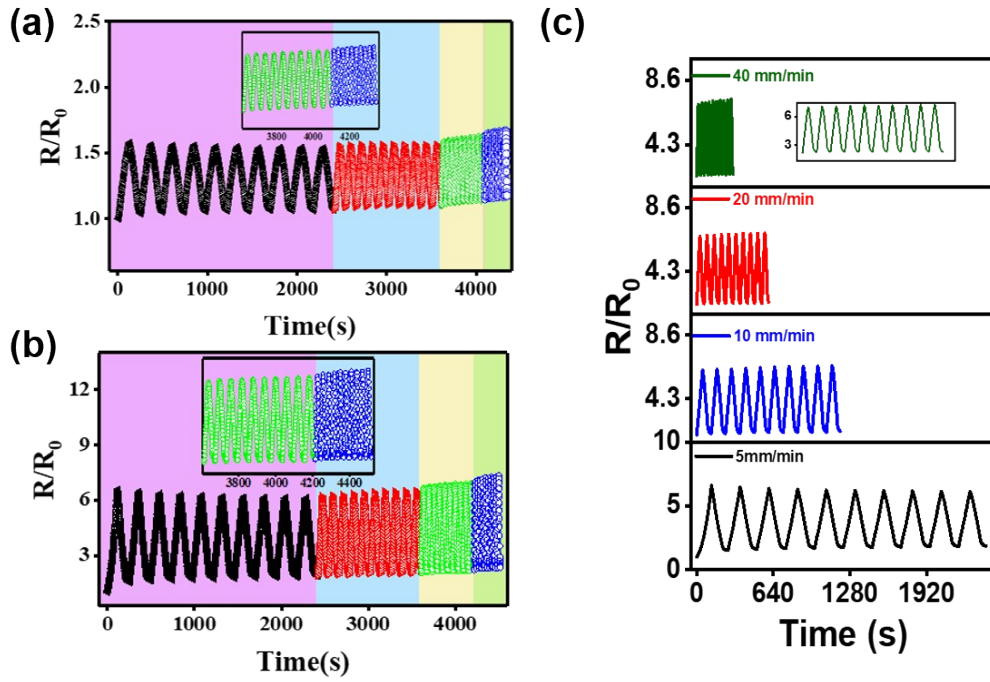

**Fig. S20.**  $R/R_0$  response of TAMF at varying frequencies under 10% strain (a), 50% strain (b),  $R/R_0$  response of TAMF at different frequencies under 50% strain (c).

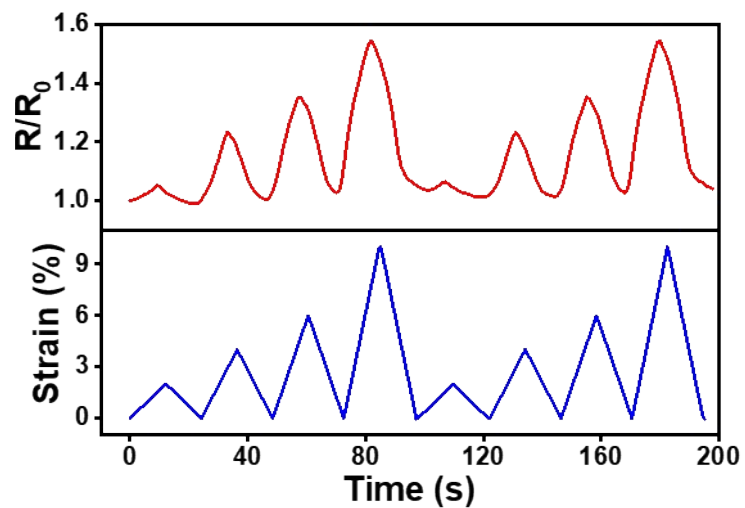

**Fig. S21.**  $R/R_0$ -time and strain-time curves of TAMF with maximum strains of 2%, 4%, 6% and 10% in two stretching-releasing cycles during step cyclic deformation.

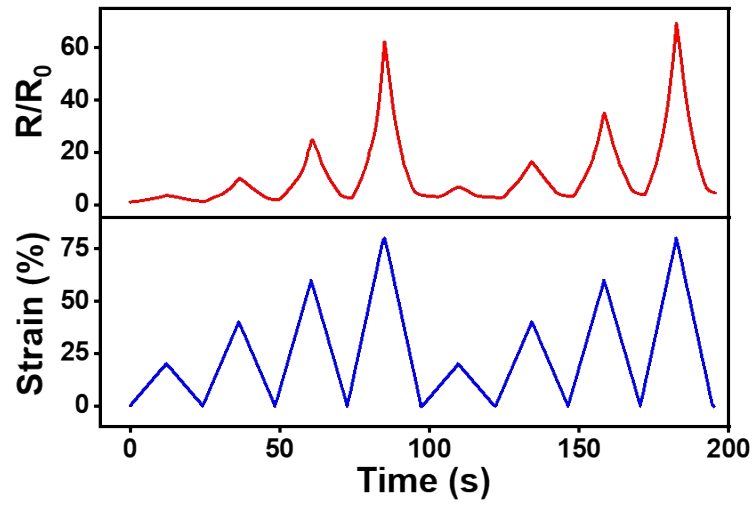

**Fig. S22.**  $R/R_0$ -time and strain-time curves of TAMF with maximum strains of 20%, 40%, 60% and 80% in two stretching-releasing cycles during step cyclic deformation.



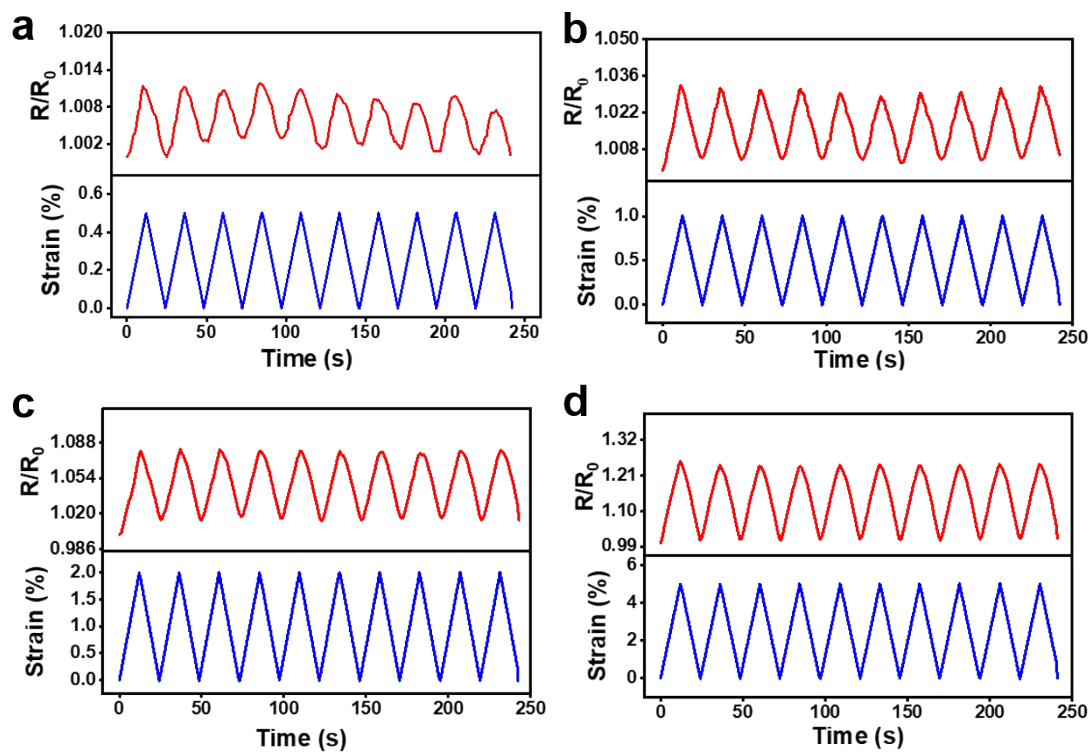

**Fig. S23**  $R/R_0$ -time and strain-time curves of TAMF with different strains of 0.5% (a), 1% (b), 2% (c) and 5% (d) in 10 stretching-releasing cycles.

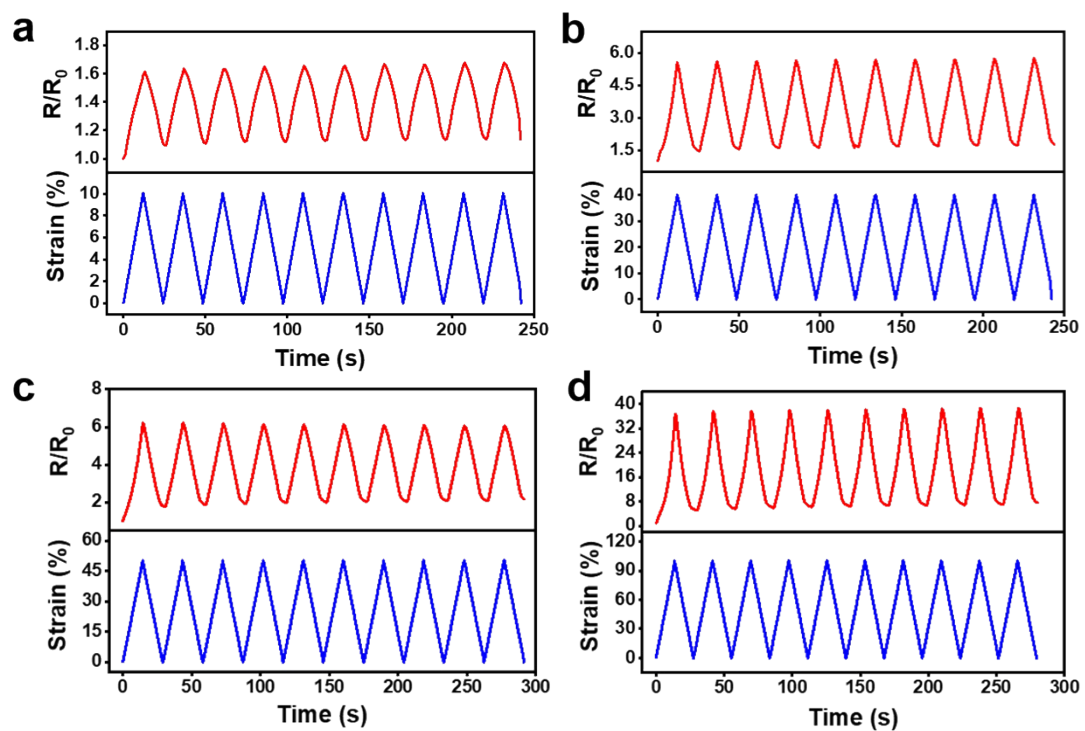

**Fig. S24.**  $R/R_0$ -time and strain-time curves of TAMF with different strains of 10% (a), 40% (b), 50% (c) and 100% (d) 10 stretching-releasing cycles.

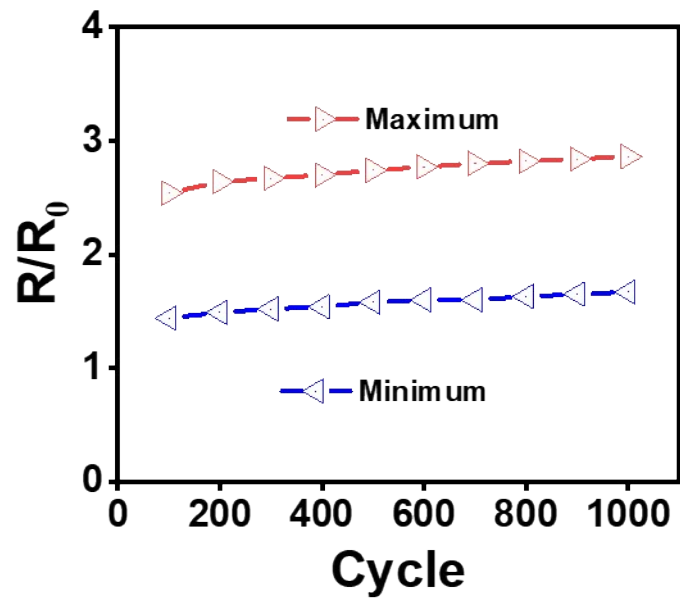

**Fig. S25.** The maximum and minimum  $R/R_0$  values in different stretching-releasing cycles (1st, 100th, 200th, 300th, 400th, 500th ... and 1000th).

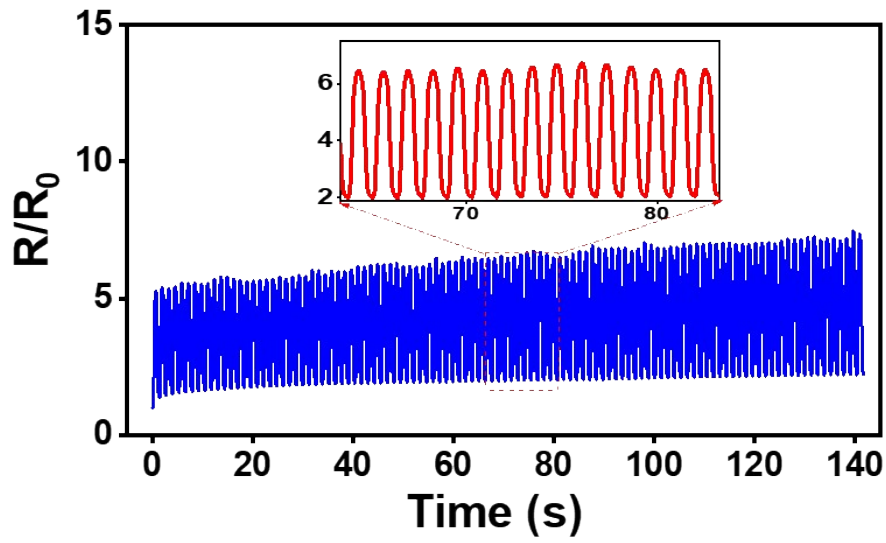

**Fig. S26**  $R/R_0$  values of TAMF with 20% strain at a rate of 1000mm/min during 100 stretching-releasing cycles, the insert shows the randomly selected 15 stretching-releasing cycles.

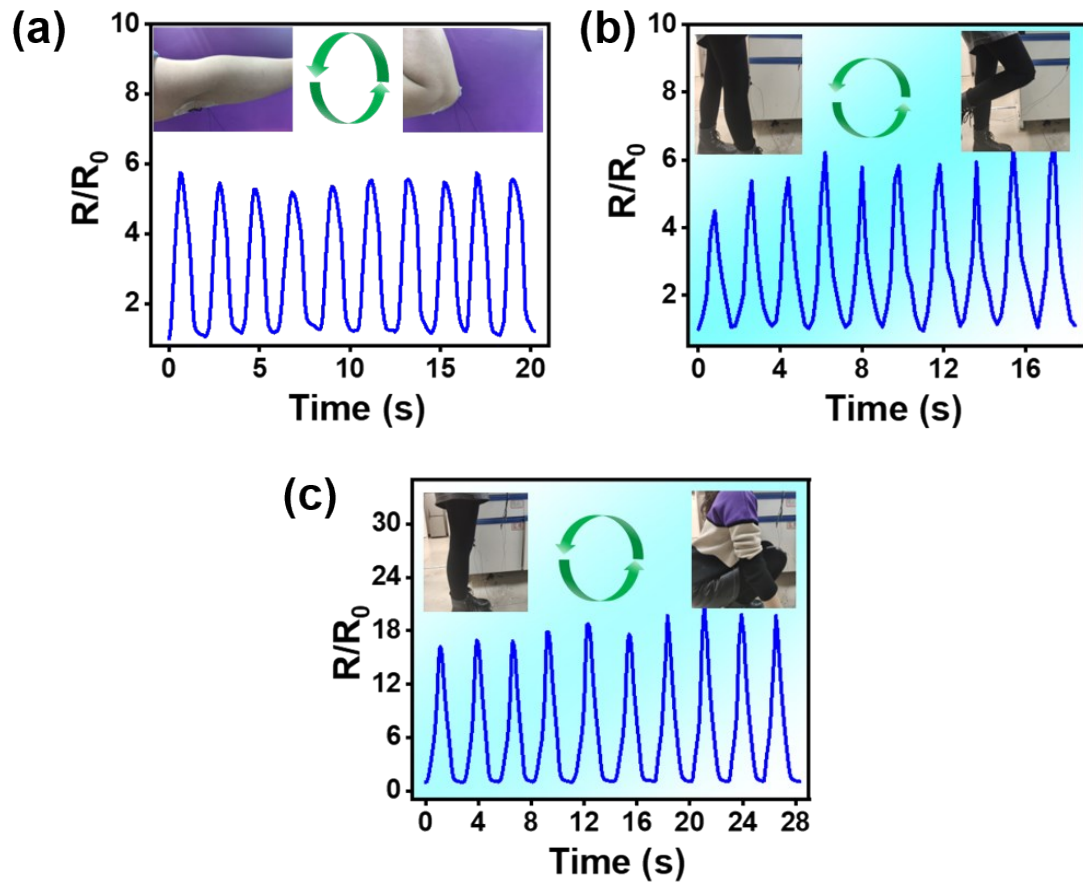

**Fig.R27** Real-time relative resistance change to detect elbow bending with varying angle of 30 °, 45 ° and 90 ° (a); real-time relative resistance change to minor the stepping (b) and squatting (c) of a volunteer.

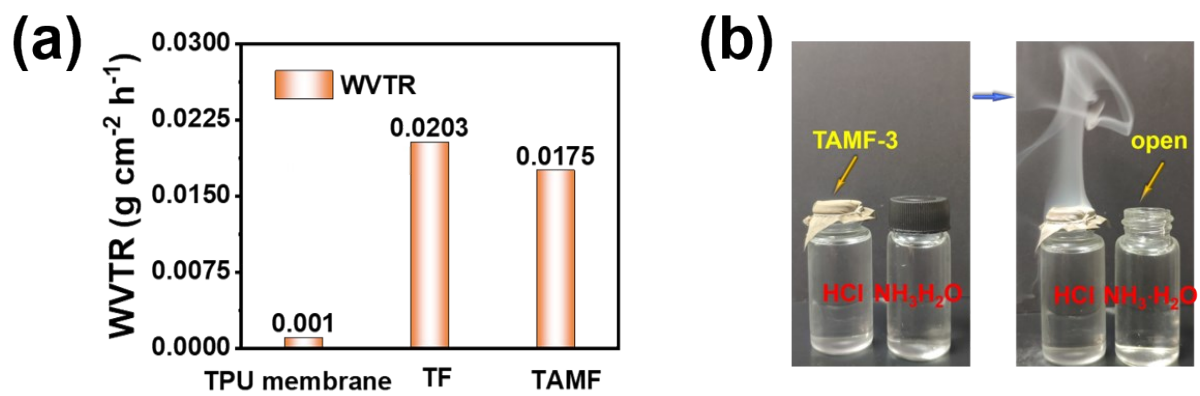

**Fig. S28.** (a) The WVTR of neat commercial TPU membrane, TF and TAMF film, (b) air permeability of TAMF.

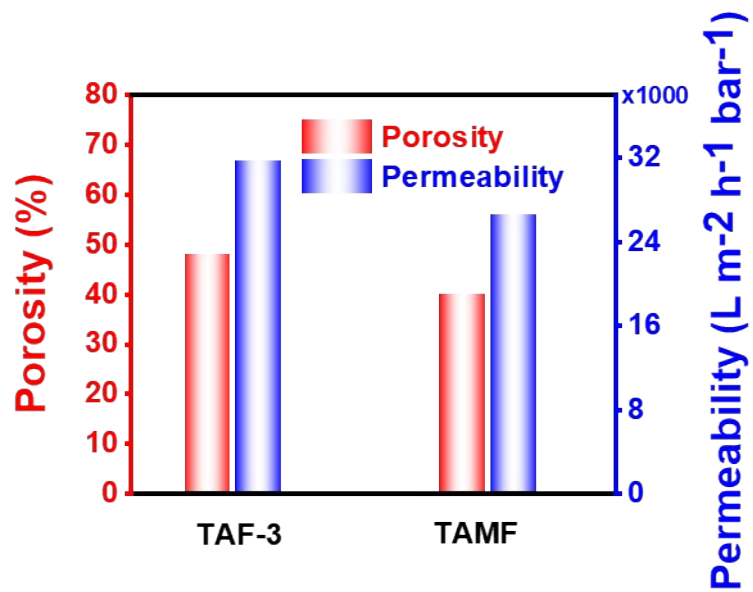

**Fig.S29** Porosity and permeability of TAF-3 and TAMF.

## References

- [1] B. Zhou, Z. Zhang, Y. Li, G. Han, Y. Feng, B. Wang, D. Zhang, J. Ma and C. Liu, *ACS Appl. Mater. Interfaces*, 2020, **12**, 4895-4905.
- [2] L. C. Jia, K. Q. Ding, R. J. Ma, H. L. Wang, W. J. Sun, D. X. Yan, B. Li and Z. M. Li, *Adv. Mater. Technol.*, 2019, **4**, 1800503.
- [3] J. Liu, H. B. Zhang, R. Sun, Y. Liu, Z. Liu, A. Zhou and Z. Z. Yu, *Adv Mater*, 2017, **29**, 1702367.
- [4] Y. J. Wan, P. L. Zhu, S. H. Yu, R. Sun, C. P. Wong and W. H. Liao, *Small*, 2018, **14**, 1800534.
- [5] J. Liu, Z. Liu, H. B. Zhang, W. Chen, Z. Zhao, Q. W. Wang and Z. Z. Yu, *Adv Electron Mater*, 2019, **6**, 1901094.
- [6] L. Wu, L. Wang, Z. Guo, J. Luo, H. Xue and J. Gao, *ACS Appl. Mater. Interfaces*, 2019, **11**, 34338-34347.
- [7] Q.-W. Wang, H.-B. Zhang, J. Liu, S. Zhao, X. Xie, L. Liu, R. Yang, N. Koratkar and Z. Z. Yu, *Adv Funct Mater*, 2019, **29**, 1806819.
- [8] Z. Fan, D. Wang, Y. Yuan, Y. Wang, Z. Cheng, Y. Liu and Z. Xie, *Chem. Eng. J*, 2020, **381**, 122696.
